# Supplementary material for: Time trends in depression prevalence and health-related correlates: results from population-based surveys in Germany 1997–1999 vs. 2009–2012
Source: Springer Nature journal article supplement (doi:10.1186/s12888-018-1973-7), 2018-12-01
Supplement: MOESM1 [file 16355904]

**Additional file 1** Prevalence of depression symptoms in cases with 12-month MDD 1997–1999<sup>1</sup> vs. 2009–2012<sup>2</sup>

|                                        | Men                     |                         |                      | Women                   |                         |                      |
|----------------------------------------|-------------------------|-------------------------|----------------------|-------------------------|-------------------------|----------------------|
|                                        | 1997–1999<br>(n = 110)  | 2009–2012<br>(n = 71)   | p-value <sup>3</sup> | 1997–1999<br>(n = 238)  | 2009–2012<br>(n = 159)  | p-value <sup>3</sup> |
| <b>Depression symptoms, % (95% CI)</b> |                         |                         |                      |                         |                         |                      |
| Depressed mood                         | 89.2 (81.1–94.0)        | 92.0 (79.8–97.1)        | 0.602                | 92.6 (87.8–95.6)        | 93.9 (89.0–96.7)        | 0.627                |
| Diminished interest/pleasure           | 71.6 (59.6–81.1)        | 68.3 (54.2–79.7)        | 0.691                | <b>78.2 (70.5–84.4)</b> | <b>63.7 (52.7–73.3)</b> | <b>0.018</b>         |
| Significant weight/appetite change     | 49.1 (38.4–59.8)        | 60.5 (46.7–72.8)        | 0.209                | <b>60.3 (52.2–67.9)</b> | <b>82.0 (74.4–87.8)</b> | <b>&lt;0.001</b>     |
| Insomnia/hypersomnia                   | 97.5 (93.0–99.2)        | 97.3 (89.7–99.3)        | 0.924                | 90.6 (84.2–94.6)        | 96.1 (91.2–98.3)        | 0.052                |
| Psychomotor agitation/retardation      | 45.1 (34.3–56.3)        | 41.5 (29.0–55.2)        | 0.694                | 49.3 (41.8–56.9)        | 52.3 (40.7–63.7)        | 0.650                |
| Fatigue/loss of energy                 | 83.6 (72.7–90.7)        | 90.8 (80.8–95.8)        | 0.236                | 92.5 (88.0–95.5)        | 91.2 (84.0–95.3)        | 0.696                |
| Guilt/worthlessness                    | <b>53.1 (42.6–63.4)</b> | <b>71.4 (57.2–82.4)</b> | <b>0.035</b>         | <b>63.9 (56.9–70.4)</b> | <b>79.4 (68.6–87.2)</b> | <b>0.019</b>         |
| Diminished ability to concentrate      | 94.2 (87.8–97.3)        | 88.9 (77.5–94.9)        | 0.213                | 84.4 (77.0–89.7)        | 86.8 (78.4–92.3)        | 0.612                |
| Suicidality                            | 53.5 (41.5–65.1)        | 58.0 (44.3–70.5)        | 0.619                | 70.9 (64.8–76.4)        | 64.4 (53.7–73.8)        | 0.258                |

<sup>1</sup> German National Health Interview and Examination Survey 1998, mental health supplement (GHS-MHS, 1997–1999): weighted for population structure as of 12/31/1997; age range: 18–65.

<sup>2</sup> German Health Interview and Examination Survey for Adults, mental health module (DEGS1-MH, 2009–2012): weighted for population structure as of 12/31/2010; age range: 18–65.

<sup>3</sup> p-value based on Rao-Scott chi-square test. Bold type indicates significant differences between 1997–1999 and 2009–2012 (local significance level  $\alpha = 0.05$ ).
