# Supplementary material for: Time trends in depression prevalence and health-related correlates: results from population-based surveys in Germany 1997–1999 vs. 2009–2012
Source: Springer Nature journal article supplement (doi:10.1186/s12888-018-1973-7), 2018-12-01
Supplement: MOESM2 [file 16355904]

**Additional file 2** Age-adjusted effect estimates for time trends in health-related correlates: 1997–1999<sup>1</sup> (reference) vs. 2009–2012<sup>2</sup>

|                                                    | Men                      |                    |                          |                    |                          |                          | Women              |                          |                    |                          |       |
|----------------------------------------------------|--------------------------|--------------------|--------------------------|--------------------|--------------------------|--------------------------|--------------------|--------------------------|--------------------|--------------------------|-------|
|                                                    | With MDD                 |                    |                          | Without MDD        |                          |                          | With MDD           |                          | Without MDD        |                          |       |
|                                                    | Effect estimate (95% CI) | p <sub>trend</sub> | Effect estimate (95% CI) | p <sub>trend</sub> | p <sub>MDD × trend</sub> | Effect estimate (95% CI) | p <sub>trend</sub> | Effect estimate (95% CI) | p <sub>trend</sub> | p <sub>MDD × trend</sub> |       |
| <b>Fair/poor self-rated health</b>                 | OR                       | 0.9 (0.4–1.8)      | 0.738                    | 0.6 (0.5–0.8)      | <b>&lt;0.001</b>         | 0.384                    | 0.5 (0.3–0.9)      | <b>0.022</b>             | 0.7 (0.5–0.9)      | <b>0.002</b>             | 0.386 |
| <b>Health-related quality of life (4 weeks)</b>    |                          |                    |                          |                    |                          |                          |                    |                          |                    |                          |       |
| Physical functioning                               | β                        | -1.0 (-4.0–2.0)    | 0.530                    | 1.0 (0.5–1.6)      | <b>&lt;0.001</b>         | 0.200                    | 0.3 (-2.1–2.8)     | 0.790                    | 1.2 (0.6–1.7)      | <b>&lt;0.001</b>         | 0.500 |
| Physical role functioning                          | β                        | -3.9 (-8.0–0.3)    | 0.069                    | -0.3 (-0.9–0.4)    | 0.378                    | 0.103                    | -0.7 (-3.5–2.1)    | 0.622                    | -0.8 (-1.4–-0.1)   | <b>0.032</b>             | 0.970 |
| Bodily pain                                        | β                        | -1.3 (-5.2–2.6)    | 0.513                    | 3.4 (2.4–4.3)      | <b>&lt;0.001</b>         | <b>0.026</b>             | 5.1 (2.2–8.1)      | <b>0.001</b>             | 3.5 (2.7–4.4)      | <b>&lt;0.001</b>         | 0.301 |
| General health                                     | β                        | -0.3 (-3.5–2.9)    | 0.872                    | 1.9 (1.2–2.5)      | <b>&lt;0.001</b>         | 0.213                    | 1.5 (-1.1–4.0)     | 0.261                    | 1.6 (0.9–2.2)      | <b>&lt;0.001</b>         | 0.931 |
| Vitality                                           | β                        | -2.2 (-6.4–1.9)    | 0.284                    | 0.2 (-0.4–0.9)     | 0.462                    | 0.240                    | 0.9 (-1.9–3.7)     | 0.543                    | 0.4 (-0.2–1.1)     | 0.204                    | 0.763 |
| Social role functioning                            | β                        | -4.4 (-8.7–0.0)    | <b>0.050</b>             | -0.1 (-0.8–0.5)    | 0.679                    | 0.061                    | 0.1 (-2.9–3.1)     | 0.947                    | -0.1 (-0.9–0.6)    | 0.720                    | 0.880 |
| Emotional role functioning                         | β                        | -8.1 (-13.0–-3.3)  | <b>0.001</b>             | -1.1 (-1.8–-0.5)   | <b>&lt;0.001</b>         | <b>0.005</b>             | -2.9 (-6.9–1.0)    | 0.143                    | -2.6 (-3.3–-1.8)   | <b>&lt;0.001</b>         | 0.858 |
| Mental health                                      | β                        | -2.0 (-5.6–1.6)    | 0.276                    | 0.6 (-0.1–1.2)     | 0.116                    | 0.171                    | 1.9 (-0.6–4.5)     | 0.128                    | 1.0 (0.2–1.8)      | <b>0.013</b>             | 0.481 |
| Physical component score                           | β                        | -0.2 (-3.7–3.2)    | 0.887                    | 1.9 (1.3–2.6)      | <b>&lt;0.001</b>         | 0.230                    | 2.5 (0.1–4.9)      | <b>0.045</b>             | 2.0 (1.4–2.7)      | <b>&lt;0.001</b>         | 0.711 |
| Mental component score                             | β                        | -5.3 (-9.5–-1.1)   | <b>0.014</b>             | -0.8 (-1.4–-0.1)   | <b>0.024</b>             | <b>0.035</b>             | -0.9 (-4.3–2.5)    | 0.620                    | -1.0 (-1.8–-0.2)   | <b>0.014</b>             | 0.920 |
| <b>Any days with activity limitation (4 weeks)</b> |                          |                    |                          |                    |                          |                          |                    |                          |                    |                          |       |
| due to mental health problems                      | OR                       | 3.6 (1.4–9.3)      | <b>0.010</b>             | 5.0 (2.0–12.2)     | <b>0.001</b>             | 0.609                    | 6.1 (2.6–14.3)     | <b>&lt;0.001</b>         | 2.3 (1.3–4.3)      | <b>0.006</b>             | 0.072 |
| due to physical health problems                    | OR                       | 1.4 (0.6–3.4)      | 0.469                    | 0.9 (0.7–1.2)      | 0.458                    | 0.368                    | 1.4 (0.7–2.6)      | 0.297                    | 0.9 (0.7–1.2)      | 0.534                    | 0.239 |
| <b>Any sick days (12 month)</b>                    | OR                       | 1.4 (0.6–3.3)      | 0.498                    | 1.5 (1.3–1.9)      | <b>&lt;0.001</b>         | 0.794                    | 1.3 (0.7–2.5)      | 0.439                    | 1.5 (1.2–1.8)      | <b>&lt;0.001</b>         | 0.688 |
| <b>No. of sick days if any</b>                     | IRR                      | 1.0 (0.6–1.9)      | 0.907                    | 0.7 (0.6–0.9)      | <b>0.005</b>             | 0.294                    | 0.7 (0.4–1.1)      | 0.090                    | 0.9 (0.7–1.1)      | 0.379                    | 0.241 |

Models include MDD, time point, age, and the interaction between MDD and time point. OR: Odds ratio from logistic regression (reference: 1997–1999); β: β coefficient from linear model; IRR: incidence rate ratio from negative binomial regression (reference: 1997–1999); p<sub>trend</sub>: p-value for testing a trend (test for OR/IRR = 1 or β = 0); p<sub>MDD × trend</sub>: p-value for testing differences in effect estimates of participants with MDD and without MDD (interaction). Bold type indicates significant results (local significance level α = 0.05).

<sup>1</sup> German National Health Interview and Examination Survey 1998, mental health supplement (GHS-MHS, 1997–1999): weighted for population structure as of 12/31/1997; age range: 18–65.

<sup>2</sup> German Health Interview and Examination Survey for Adults, mental health module (DEGS1-MH, 2009–2012): weighted for population structure as of 12/31/2010; age range: 18–65.
